# Supplementary material for: Traditional landmark versus ultrasound guided tracheal puncture during percutaneous dilatational tracheostomy in adult intensive care patients: a randomised controlled trial
Source: Springer Nature journal article supplement (doi:10.1186/s13054-014-0514-0), 2014-09-11
Supplement: MOESM7 [file 9779636]

ENROLLMENT

Assessed for eligibility (n=72)

Excluded (n=22)  
Not meeting inclusion criteria (n=0)  
Declined to participate (n=3)  
Other reason(s) :  
- Equipment not available (n=1)  
- Unable to obtain consent - no next of kin (n=1)  
- Missed (n=17)

Randomized (n=50)

Landmark

Ultrasound

ALLOCATED

Allocated to intervention (n=25)  
Received allocated intervention : (n=24)  
Did not receive allocated intervention (n=1)  
Reason(s) :  
- Died prior to tracheostomy (n=1)

Allocated to intervention (n=25)  
Received allocated intervention : (n=24)  
Did not receive allocated intervention (n=1)  
Reason(s) :  
- Extubated prior to tracheostomy (n=1)

FOLLOW UP

Lost to follow up (n=1)  
Reason(s) :  
- Transfer to other facility - unable to trace (n=1)  
Discontinued intervention (n=0)

Lost to follow up (n=0)  
Discontinued intervention (n=0)

ANALYSIS

Analysed (n=24)  
Excluded from analysis (n=1)  
Reason(s) :  
- Died prior to intervention - no procedural data (n=1)

Analysed (n=23)  
Excluded from analysis (n=2)  
Reason(s) :  
- Extubated prior to intervention - no data (n=1)  
- Protocol violation - no data/video recorded (n=1)
